# Supplementary material for: Biochemical and biophysical characterization of purified native CD20 alone and in complex with rituximab and obinutuzumab
Source: PubMed Central journal article supplement (PMC6757138; doi:10.1038/s41598-019-50031-4), 2019-09-23
Supplement: 41598_2019_50031_MOESM1_ESM.pdf [file 41598_2019_50031_MOESM1_ESM.pdf]

## SUPPLEMENTARY MATERIAL

**TITLE: Biochemical and biophysical characterization of purified native CD20 alone and in complex with rituximab and obinutuzumab**

### AUTHORS:

Morgane AGEZ<sup>1</sup>, Elodie DESUZINGES MANDON<sup>1</sup>, Thomas IWEMA<sup>1</sup>, Reto GIANOTTI<sup>2</sup>, Florian LIMANI<sup>2</sup>, Sylvia HERTER<sup>2</sup>, Ekkehard MÖSSNER<sup>2</sup>, Eric A KUSZNIR<sup>3</sup>, Sylwia HUBER<sup>3</sup>, Matthias LAUER<sup>3</sup>, Philippe RINGLER<sup>4</sup>, Claudia FERRARA<sup>2</sup>, Christian KLEIN<sup>2</sup> & Anass JAWHARI<sup>1¶</sup>

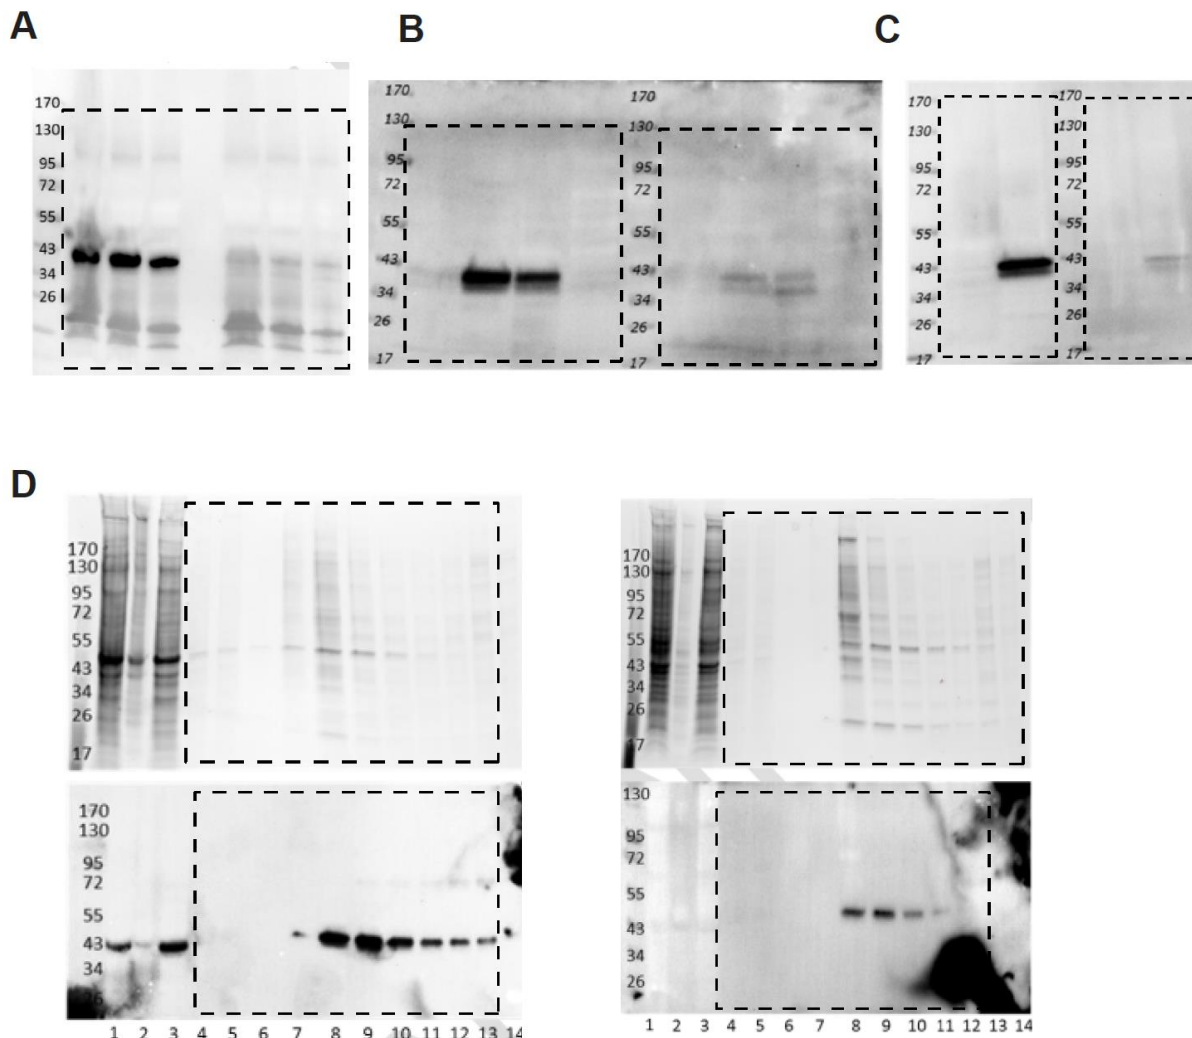

**Figure S1:** Original gels or Western-blot used for Figure 1A-D. A rectangle represents what is shown in the main figures.

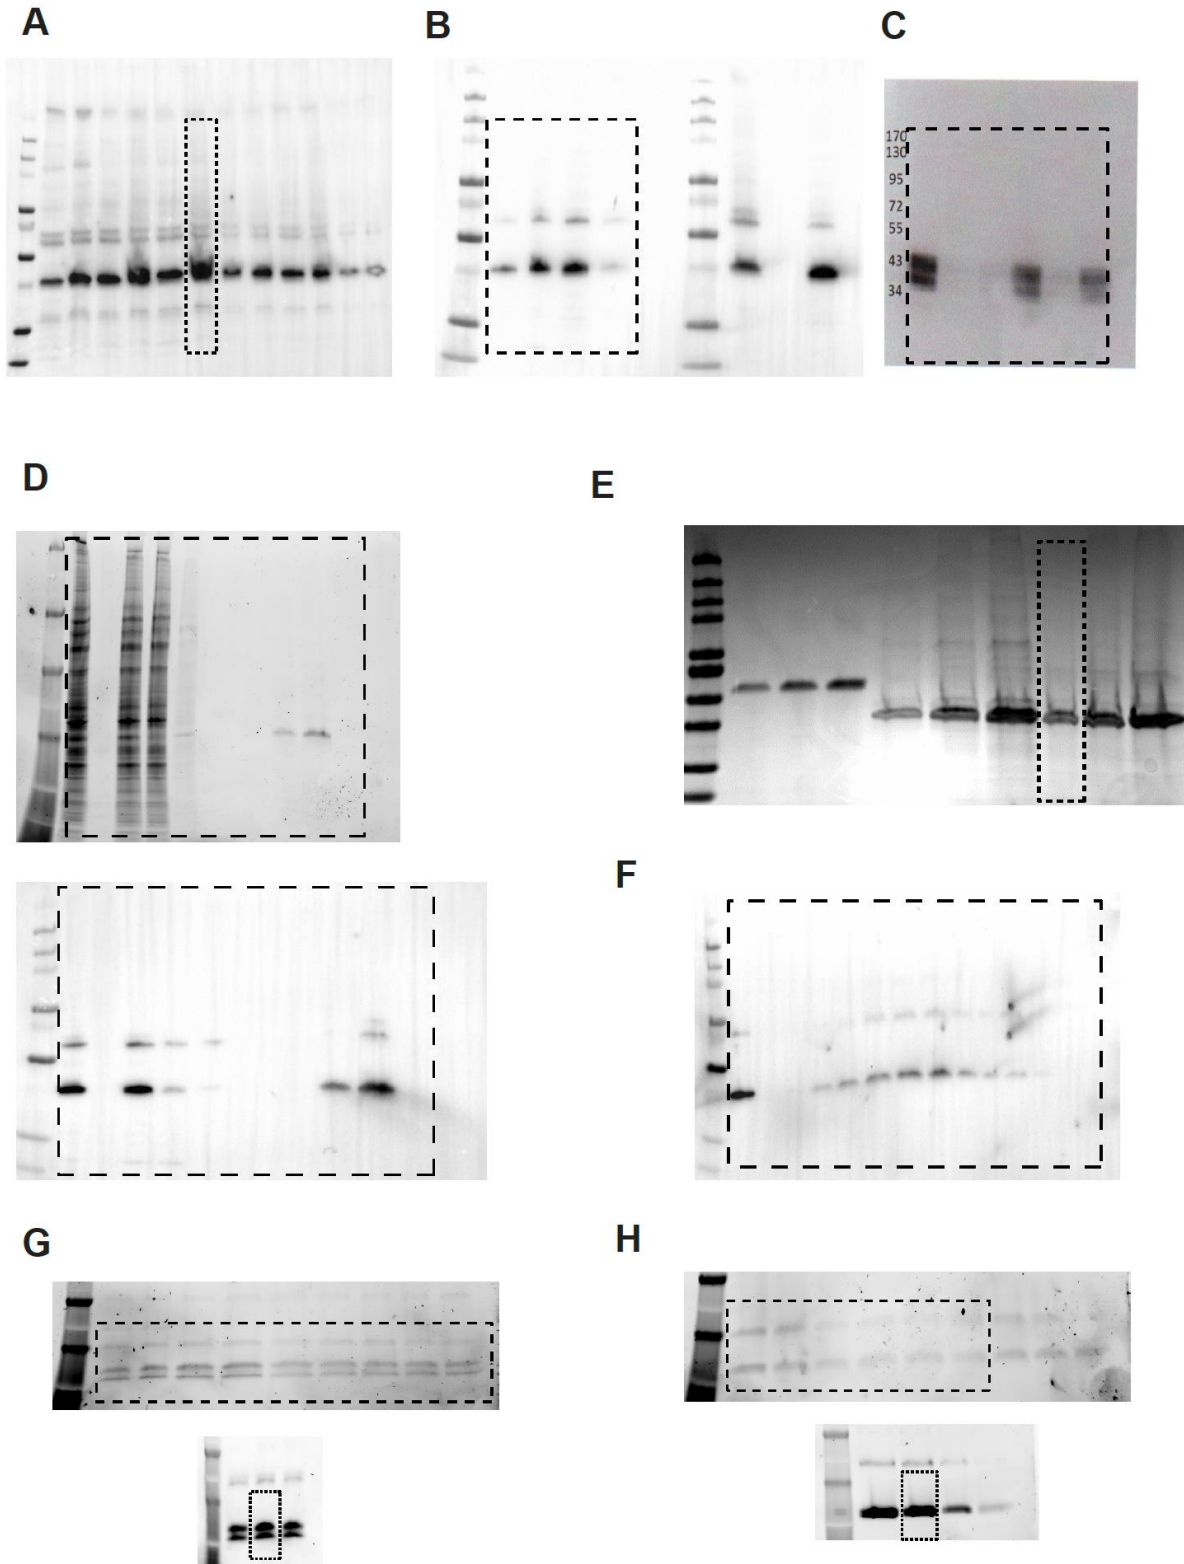

**Figure S2:** Original gels or Western-blot used for the main Figures. A-E correspond to Figure 2A-E. F corresponds to Figure 3A. G-H correspond to Figure 5A-B. A rectangle represents what is shown in the main figures.

**A**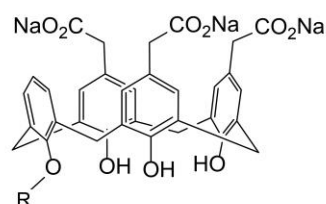**B**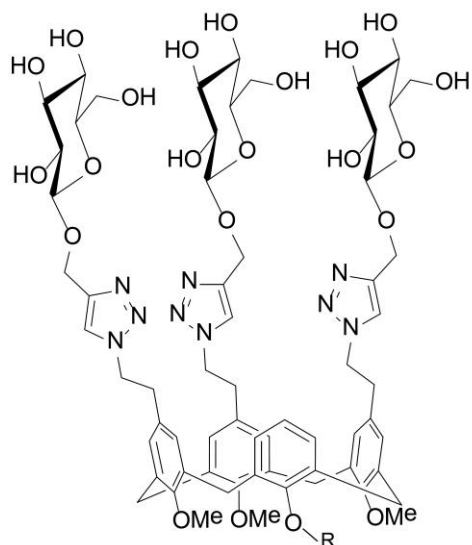

**Figure S3:** Structure of two calixarene based detergents used for solubilization and purification of CD20. **A-** 5,11,17-tris[(carboxy)methyl]-25-monoalkoxy-26,27,28-trihydroxycalix[4]arene. Also called CALX-R2 in this manuscript. **B-** 5,11,17-tris(2-[4-( $\beta$ -D-glucopyranosyl)-1H-1,2,3-triazol-1-yl]ethyl)-25-monoalkoxy-26,27,28-trimethoxycalix[4]arene; respectively, also called CALX-173-GK. R corresponds to an aliphatic tail of seven carbons.

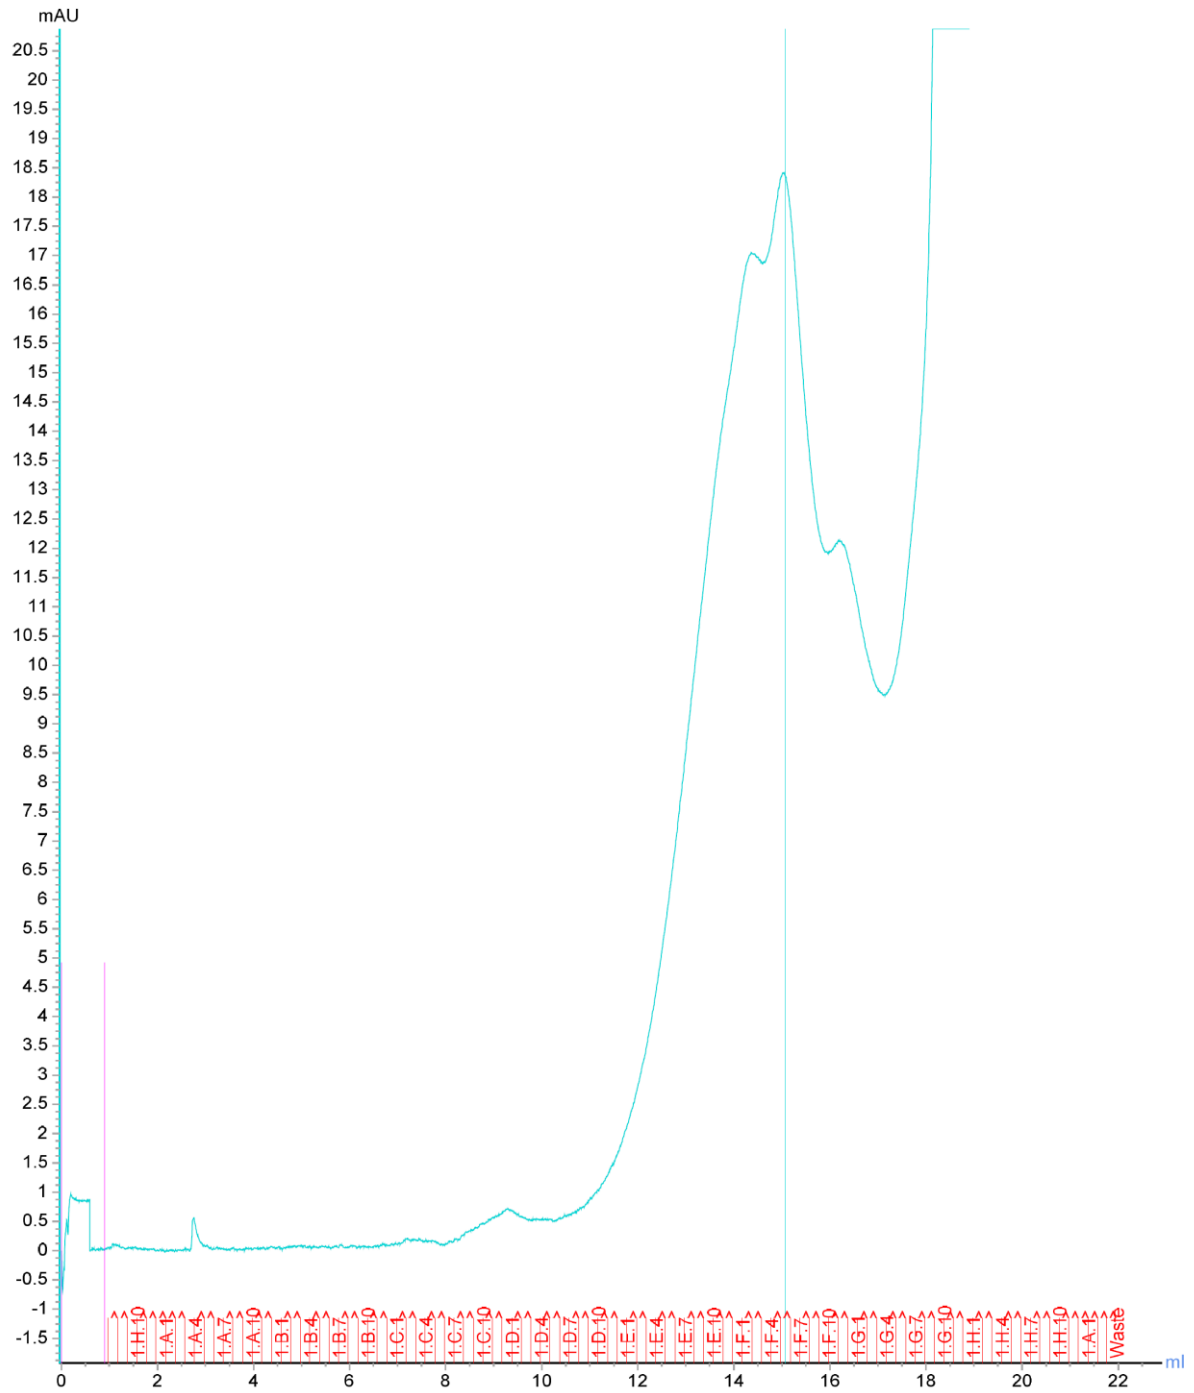

**Figure S4:** Full length size exclusion chromatogram of purified CD20.

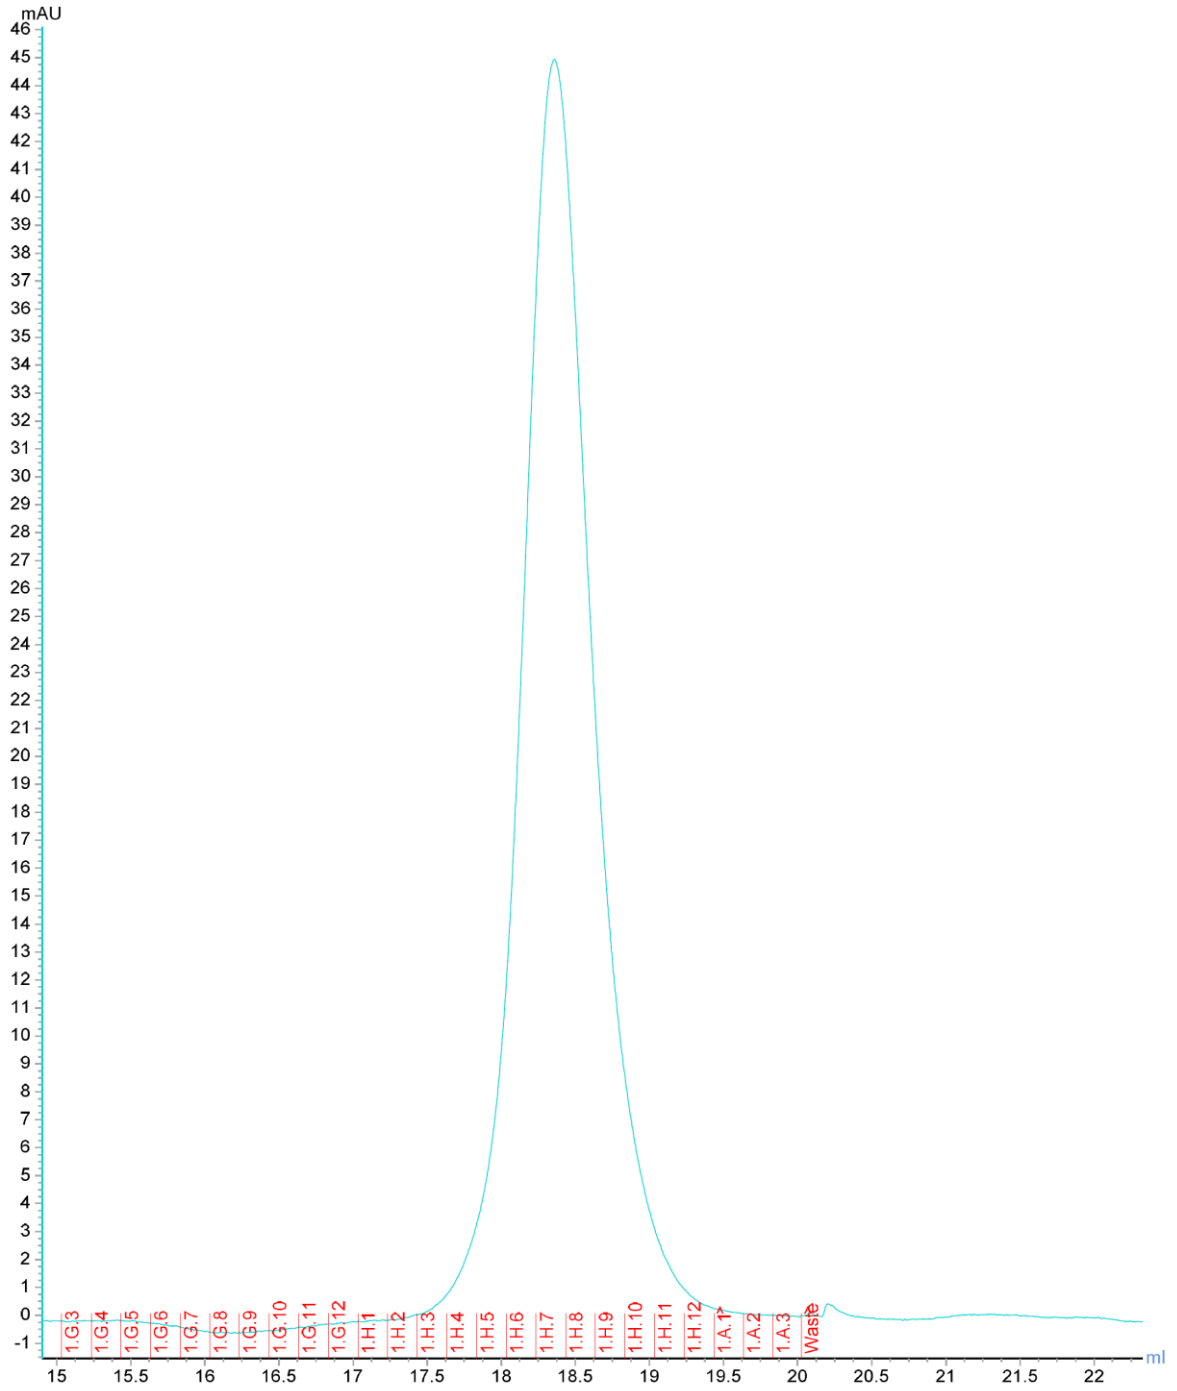

**Figure S5:** Full length size exclusion chromatogram of the rituximab.

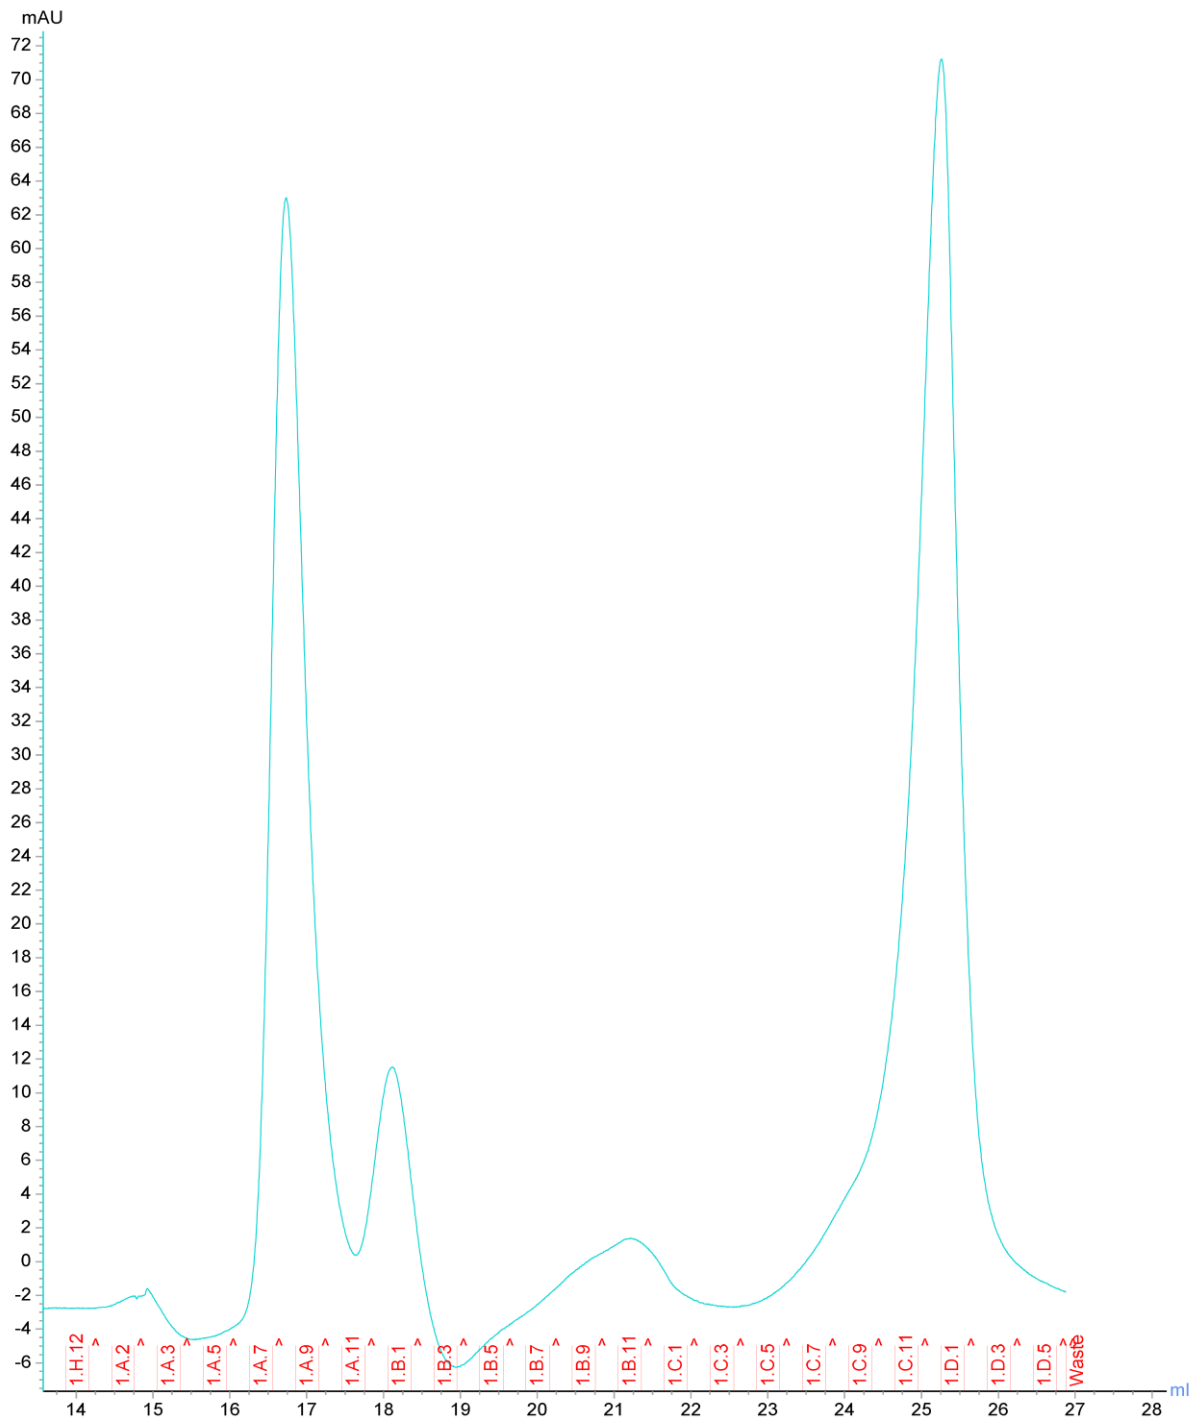

**Figure S6:** Full length size exclusion chromatogram of the obinutuzumab.

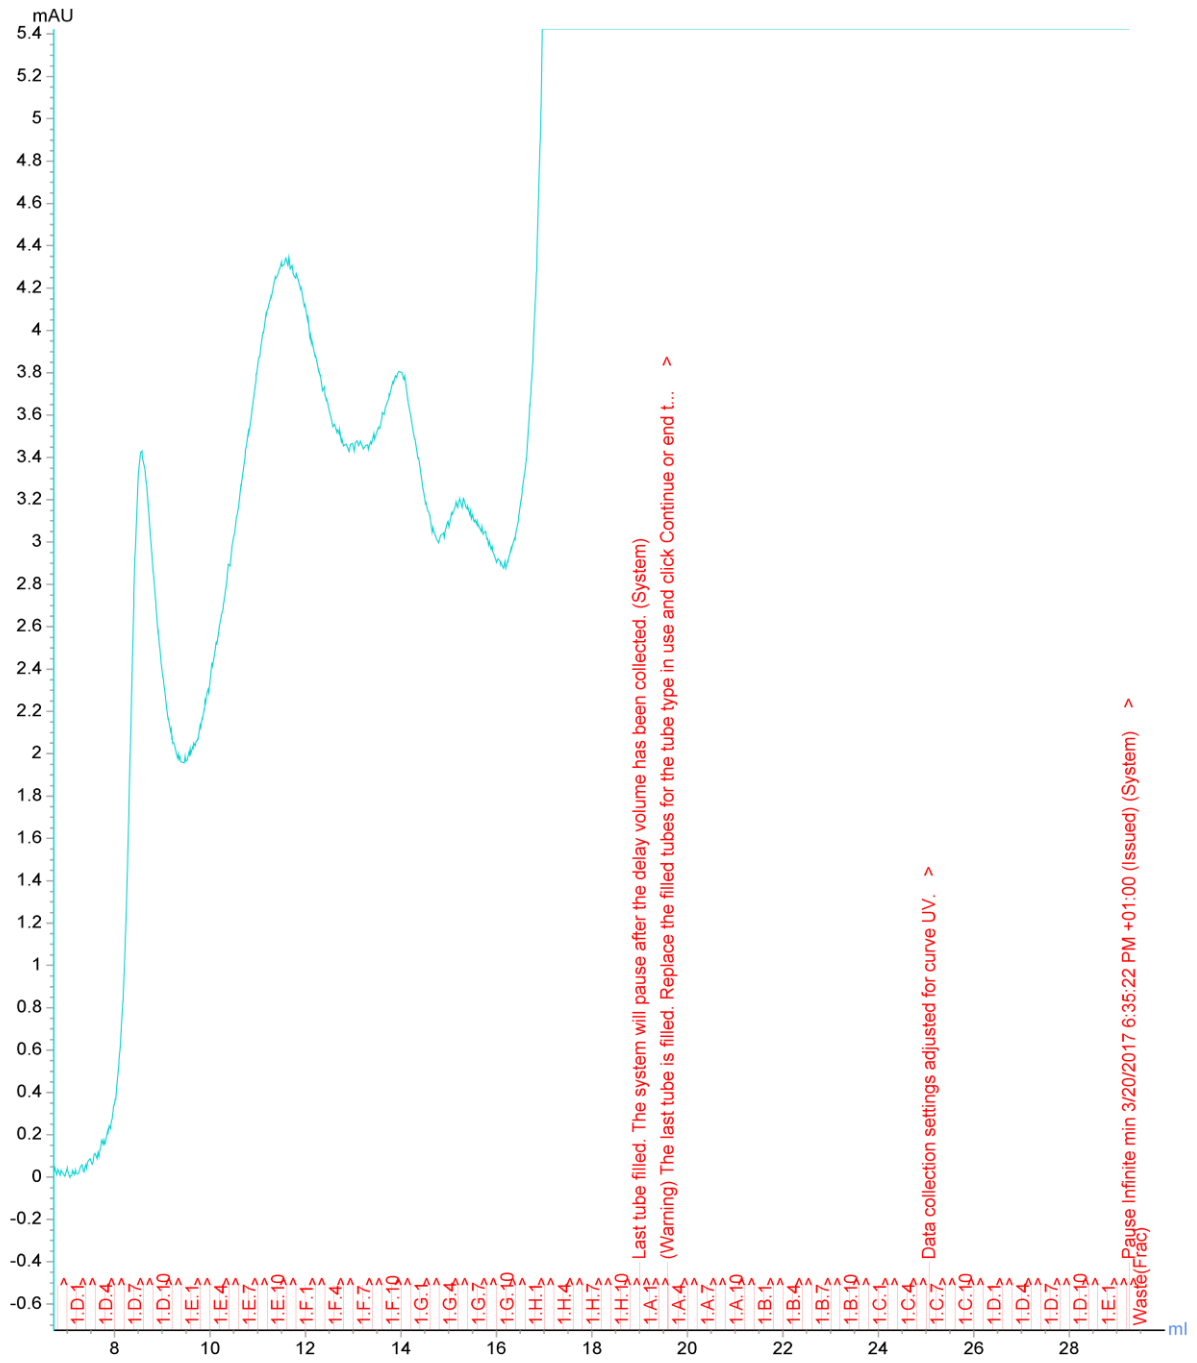

**Figure S7:** Full length size exclusion chromatogram of CD20/rituximab complex.

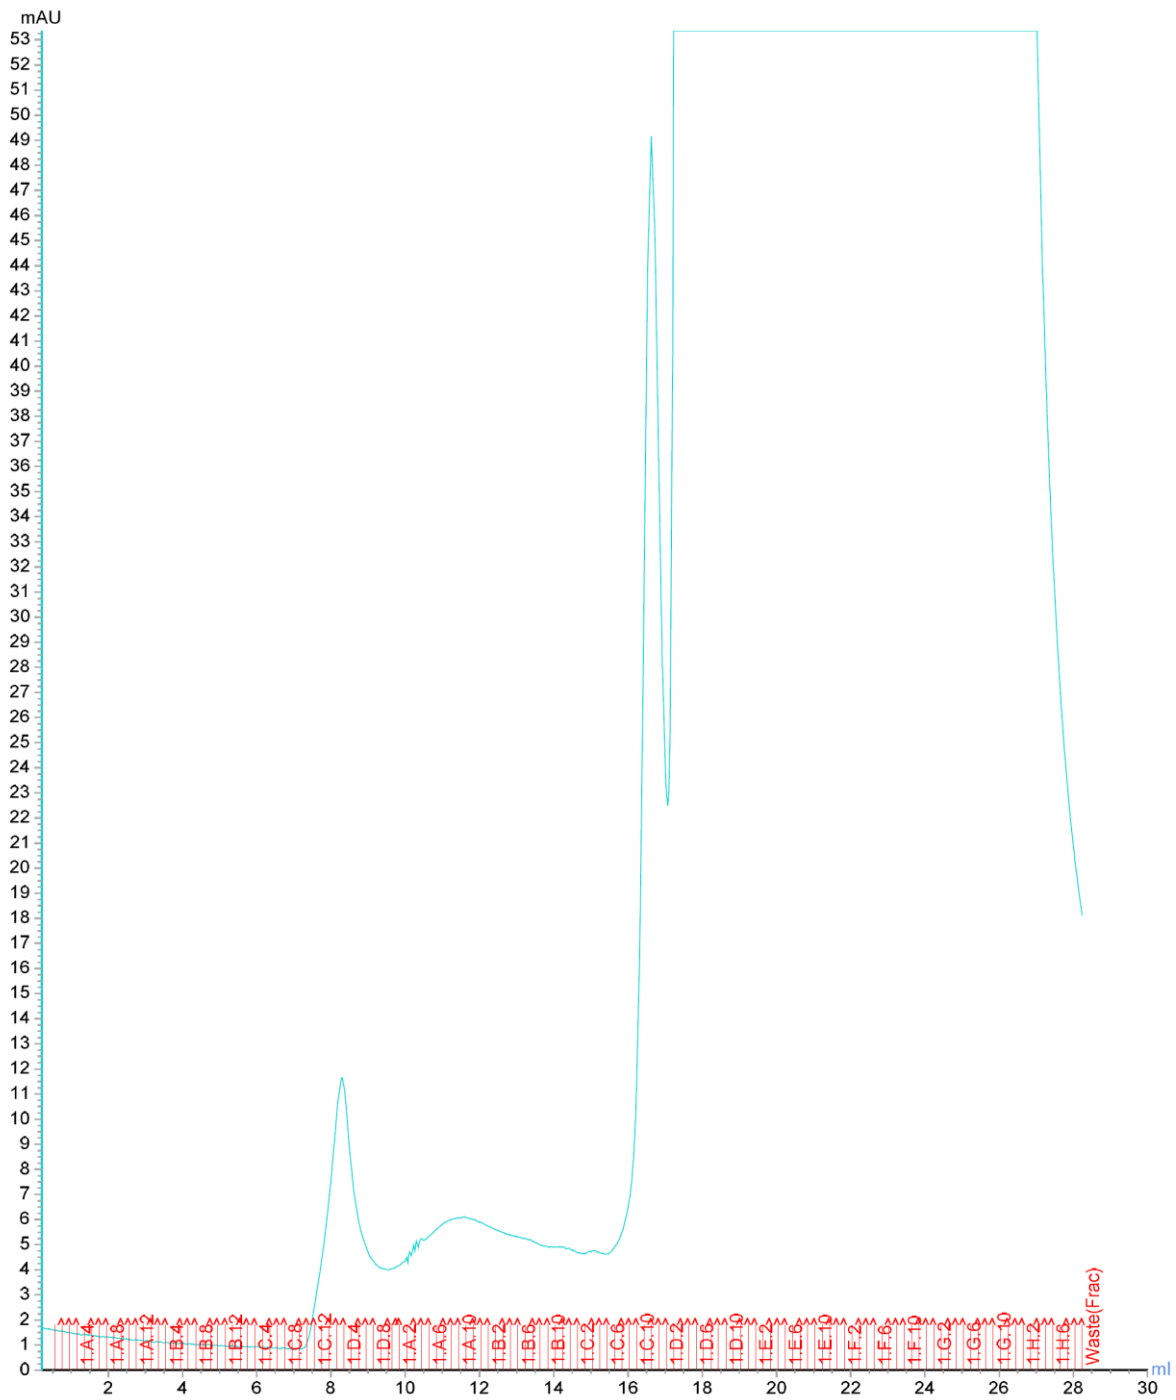

**Figure S8:** Full length size exclusion chromatogram of CD20/ obinutuzumab complex.



| Sample            | conc. [mg/ml] | Detergent in buffer | Detection system | Peak  | sw [S] | f/f0 | Area [%] | vbar [ml.g <sup>-1</sup> ] | MW <sub>exp.</sub> [kDa] | MW <sub>calc.</sub> [kDa] | Interpretation          |
|-------------------|---------------|---------------------|------------------|-------|--------|------|----------|----------------------------|--------------------------|---------------------------|-------------------------|
| CALX-173-GK alone | 5,000         | CALX-173-GK         | Interference     | 1     | 2,9    | 1,18 | 100      | 0,764                      | no                       | 38                        | detergent micelle       |
| CD20              | 0,500         | CALX-173-GK         | Absorbance       | 1     | 3,5    | 1,35 | 30       | 0,741                      | 34                       | ~ 54                      | probably monomeric CD20 |
|                   |               |                     |                  | 2     | 4,6    |      | 70       |                            |                          |                           |                         |
|                   |               |                     |                  | 3     | 5,8    |      |          |                            |                          |                           |                         |
|                   |               |                     |                  | 4     | 7,7    |      |          |                            |                          |                           |                         |
|                   |               |                     |                  | 5     | 10,0   |      |          |                            |                          |                           |                         |
| CD20              | 0,500         | CALX-173-GK         | Interference     | 1     | 3,5    | 1,35 | 27       | 0,741                      | 34                       | ~ 61                      | probably monomeric CD20 |
|                   |               |                     |                  | 2     | 4,4    |      | 73       |                            |                          |                           |                         |
|                   |               |                     |                  | 3     | 5,8    |      |          |                            |                          |                           |                         |
|                   |               |                     |                  | 4     | 7,4    |      |          |                            |                          |                           |                         |
|                   |               |                     |                  | 5     | 8,6    |      |          |                            |                          |                           |                         |
|                   |               |                     |                  | 6     | 9,9    |      |          |                            |                          |                           |                         |
| DDM alone         | 20,000        | DDM                 | Interference     | 1     | 2,9    | 1,00 | 100      | 0,836                      | 50                       | 53                        | detergent micelle       |
| CD20              | 0,044         | CALX-173-GK         | Absorbance       | 1     | 3,6    | 1,35 | 46       | 0,741                      | 34                       | ~ 57                      | probably monomeric CD20 |
|                   |               |                     |                  | 2     | 5,8    |      | 17       |                            |                          |                           |                         |
|                   |               |                     |                  | range | 6-12   |      | 37       |                            |                          |                           |                         |
| CD20              | 0,044         | DDM                 | Absorbance       | 1     | 3,1    | 1,42 | 72       | 0,741                      | 34                       | ~ 48                      | probably monomeric CD20 |
|                   |               |                     |                  | 2     | 5,0    |      | 28       |                            |                          |                           |                         |

**Table S9:** Summary of AUC calculations of the molecular mass of CD20 species.

Expected molecular mass (MW<sub>exp.</sub>) was calculated from protein amino acid sequence. The partial specific volume (vbar) of the protein alone was taken into account as it is impossible to determine exact detergent/protein ratio due to simultaneous absorbance of the protein and CALX-173-GK detergent. Therefore, the calculated molecular masses should be interpreted as “estimates”.
